1  
2  
3  
4  
5  
6  
7  
8  
9  
10  
11  
12  
13  
14  
15  
16  
17  
18  
19  
20  
21  
22  
23  
24

Axonal Injury, Sleep Disturbances, and Memory following Traumatic Brain Injury.

Emma M. Tinney<sup>1,2</sup>, Goretti España-Irla<sup>2,3</sup>, Aaron E.L. Warren<sup>4</sup>, Lauren N. Whitehurst<sup>5</sup>,  
Alexandra M Stillman<sup>6</sup>, Charles H. Hillman<sup>1,2,3</sup>, Timothy P. Morris<sup>2,3,7</sup>, for the Alzheimer’s  
Disease Neuroimaging Initiative\*

<sup>1</sup>Department of Psychology, Northeastern University, Boston, MA, USA

<sup>2</sup>Center for Cognitive & Brain Health, Northeastern University, Boston, MA, USA

<sup>3</sup>Department of Physical Therapy, Movement, & Rehabilitation Sciences, Northeastern  
University, Boston, MA, USA

<sup>4</sup>Department of Neurosurgery, Brigham and Women’s Hospital, Harvard Medical School,  
Boston, MA, USA

<sup>5</sup>Department of Psychology, University of Kentucky, Lexington, KY, USA

<sup>6</sup>Department of Neurology, Beth Israel Deaconess Medical Center, Boston, MA, USA

<sup>7</sup>Department of Applied Psychology, Northeastern University, Boston, MA, USA

\*Data used in preparation of this article were obtained from the Alzheimer’s Disease  
Neuroimaging Initiative (ADNI) database ([adni.loni.usc.edu](http://adni.loni.usc.edu)). As such, the investigators within  
the ADNI contributed to the design and implementation of ADNI and/or provided data but did  
not participate in analysis or writing of this report. A complete listing of ADNI investigators can  
be found at: [http://adni.loni.usc.edu/wp-  
content/uploads/how\\_to\\_apply/ADNI\\_Acknowledgement\\_List.pdf](http://adni.loni.usc.edu/wp-content/uploads/how_to_apply/ADNI_Acknowledgement_List.pdf)

Corresponding author: Timothy P. Morris, PhD ([tim.peter.morris@gmail.com](mailto:tim.peter.morris@gmail.com)). Center for  
Cognitive and Brain Health, Northeastern University, 805 Columbus Ave, Boston, USA, 02115.

Abstract

25  
26  
27  
28  
29  
30  
31  
32  
33  
34  
35  
36  
37  
38  
39  
40  
41  
42  
43  
44  
45  
46  
47  
48

Objectives: Traumatic brain injury (TBI) is associated with sleep deficits, but it is not clear why some report sleep disturbances and others do not. The objective of this study was to assess the associations between axonal injury, sleep, and memory in chronic and acute TBI.

Methods: Data were acquired from two independent datasets which included 156 older adult veterans (69.8 years) from the Alzheimer’s Disease Neuroimaging Initiative (ADNI) with prior moderate-severe TBIs and 90 (69.2 years) without a TBI and 374 participants (39.6 years) from Transforming Research and Clinical Knowledge in TBI (TRACK-TBI) with a recent mild TBI (mTBI) and 87 controls (39.6 years), all who completed an MRI, memory assessment, and sleep questionnaire.

Results: Older adults with a prior TBI had a significant association between axial diffusivity in the left anterior internal capsule (ALIC) and sleep disturbances [95% CI(5.0e+07, 1.7e+08),  $p \leq .01$ ]. This association was significantly different [95% CI(6.8e+07, 2.2e+08),  $p = .01$ ] from controls. ALIC predicted changes in memory over one-year in TBI [95% CI(-1.8e+08, -2.7e+07),  $p = .03$ ]. We externally validated those findings in TRACK-TBI where ALIC axial diffusivity within two-weeks after injury was significantly associated with higher sleep disturbances in the TBI group at two-weeks [95% CI(-7.2e-06, -1.9e-04),  $p = 0.04$ ], six-months [95% CI(-4.2e-06, -1.3e-04),  $p \leq .01$ ] and 12-months post-injury [95% CI(-5.2e-06, -1.2e-04),  $p = 0.03$ ]. These associations not seen in controls.

Interpretations: Axonal injury to the ALIC is robustly associated with sleep disturbances in multiple TBI populations. Early assessment of ALIC damage following mTBI could identify those at risk for persistent sleep disturbances following injury.

## 49 Introduction

50 Traumatic brain injury (TBI) has the highest incidence of all common neurological  
51 disorders<sup>1</sup> and patients report a variety of behavioral symptoms that can last for years post injury  
52 . However, it is not clear why some individuals report sleep disturbances and others do not.  
53 Around half of all adults with TBI report sleep disturbances including insomnia, hypersomnia,  
54 and poor sleep quality<sup>2</sup>, with sleep disorders being three times more common in TBI patients  
55 than in the general population<sup>3</sup>.

56 Importantly, chronic sleep disorders are known to have negative effects on memory  
57 function across the lifespan<sup>4</sup>. Studies also show that a history of TBI can be associated with  
58 increased risk of cognitive decline<sup>6</sup> and pathological aging<sup>7</sup>. In non-TBI populations, sleep  
59 disturbances have been previously associated with the integrity of white matter in specific tracts  
60 in the brain. For example, decreased white matter integrity of association fibers such as the  
61 superior longitudinal fasciculi, commissarial fibers in the corpus callosum, and projection fibers  
62 of the internal capsule and corona radiata have been reported in non-injured adults with poor  
63 sleep quality<sup>8</sup> and insomnia<sup>9</sup>. A hallmark of TBI is diffuse axonal injury (DAI) caused by shear  
64 and tensile forces placed upon the brain during the initial impact, where almost every tract  
65 studied shows axonal injury following acute mTBI<sup>10</sup>. Importantly, there is evidence that white  
66 matter lesions caused by disease or other injury types lead to sleep disturbances<sup>11</sup>. For example,  
67 demyelination in patients with multiple sclerosis often precipitates sleep deficits, with the precise  
68 location of the lesions determining the type of deficit<sup>11</sup>. Nevertheless, the relationship between  
69 sleep and white matter is complex and recent work has proposed that the relationship between  
70 structural alterations and sleep is likely bi-directional<sup>12,13</sup>.

71 Identifying mechanisms of sleep disturbances in TBI is important for several reasons.  
72 First, given poor sleep quality is linked with cognitive decline, identifying mechanisms of sleep  
73 disturbances after injury can improve clinically targeted interventions. Second, it can increase  
74 insights into why some individuals with TBI report sleep disturbances and others do not. Third, it  
75 can help refine prognostic models designed to predict behavioral outcomes in those living with  
76 the consequences of injury.

77 Here, we use diffusion-weighted imaging to test the associations between axonal injury to  
78 a-priori sleep-related white matter tracts and sleep disturbances in older adults who suffered a  
79 TBI decades prior and adults with an acute (< two weeks) mild TBI. We test these associations in  
80 two independent cohorts and compare them to non-injured adults to test if they are specific to  
81 TBI. We further test whether sleep-related axonal injury predicts memory changes over one-year  
82 in both cohorts.

83

## 84 Methods

### 85 *Participants*

86 Older adults with TBI history: ADNI/DoD: Data from the Brain Aging in Vietnam War  
87 Veterans (ADNI/DoD) dataset, part of the Alzheimer's Disease Neuroimaging Initiative (ADNI)  
88 database were used. Full details of ADNI/DoD and participant inclusion criteria is found in  
89 supplementary materials 1. For the current study, 246 male veterans aged 60-85 with (N=156)  
90 and without a history (N = 90) of non-penetrating moderate-severe TBI, who had complete  
91 diffusion-weighted MRI scans and Pittsburgh sleep quality index (PSQI) scores were included.  
92 Session one consisted of a memory assessment (Ray Auditory Verbal Learning Test (RAVLT)),  
93 magnetic resonance imaging (MRI) scan, and self-report sleep assessment. All measurements  
94 were repeated one year later. Participant characteristics for ADNI/DoD are in Table 1.

95  
96

Table 1: ADNIDOD Participant Characteristics

|                                      | <b>TBI (mean ± SD)</b> | <b>No TBI (mean ± SD)</b> | <b>Difference</b>    |
|--------------------------------------|------------------------|---------------------------|----------------------|
| Age                                  | 69.85 ± 4.6            | 69.2 ± 4.7                | t=1.25               |
| Sex                                  | All Male               | All Male                  | X <sup>2</sup> =0    |
| Years of Education                   | 15.21 ± 2.4            | 15.49 ± 2.2               | t=-0.92              |
| American Indian (%)                  | 1%                     | 1%                        | X <sup>2</sup> =0    |
| Asian (%)                            | 0%                     | 2%                        | X <sup>2</sup> =1.02 |
| Black/African American (%)           | 9%                     | 8%                        | X <sup>2</sup> =0    |
| White (%)                            | 93%                    | 81%                       | X <sup>2</sup> =0.96 |
| More than 1/Unknown (%)              | 3%                     | 7%                        | X <sup>2</sup> =0.12 |
| Depression <sup>a</sup> (n)          | 39                     | 22                        | X <sup>2</sup> =0.27 |
| PTSD Current <sup>b</sup> (n)        | 61                     | 41                        | X <sup>2</sup> <0.01 |
| PTSD Lifetime <sup>c</sup> (n)       | 85                     | 45                        | X <sup>2</sup> =2.48 |
| MMSE <sup>d</sup>                    | 28.15 ± 1.8            | 28.3 ± 1.6                | t=-0.81              |
| Time Since Injury (years)            | 25 ± 14.9              | NA                        | NA                   |
| Total number of TBIs                 | 1.6 ± 1.3              | NA                        | NA                   |
| <b>Pittsburg Sleep Quality Index</b> | 11.76 ± 2.1            | 11.63 ± 2.6               | t=0.81               |
| Subjective Sleep Quality             | 1.22 ± 0.78            | 1.25 ± 0.72               | t=-0.26              |
| Sleep Latency                        | 1.22 ± 1.07            | 1.14 ± 0.95               | t=0.63               |
| Sleep Duration                       | 1.63 ± 1.11            | 1.72 ± 1.05               | t=-0.61              |
| Sleep Efficiency                     | 2.82 ± 0.65            | 2.91 ± 0.36               | t=-1.05              |
| Sleep Disturbance                    | 2.56 ± 0.49            | 2.42 ± 0.54               | t=2.02               |
| Use of Sleep medication              | 2.24 ± 1.14            | 2.19 ± 1.22               | t=0.27               |
| Daytime Dysfunction                  | 1.32 ± 0.56            | 1.31 ± 0.69               | t=0.13               |
| APOE <sup>e</sup> (n)                | 43                     | 21                        | X <sup>2</sup> =2.14 |
| RAVLT Immediate Recall <sup>f</sup>  | 48.90 ± 11.0           | 48.35 ± 10.15             | t=0.81               |
| RAVLT Delayed Recall                 | 12.57 ± 2.2            | 13.01 ± 1.8               | t=0.25               |
| RAVLT Recognition                    | 6.49 ± 3.56            | 6.78 ± 3.32               | t=0.13               |

97 <sup>a</sup>Number of participants who had depression, taken from the Geriatric Depression Scale

98 <sup>b</sup>Number of participants who currently have post-traumatic stress disorder (PTSD)

99 <sup>c</sup>Number of participants who have had post-traumatic stress disorder (PTSD) in their lifetime

100 <sup>d</sup>Mini-Mental State Examination (MMSE) to check for cognitive impairment

101 <sup>e</sup>Number of participants who have at least one apolipoprotein E4 (APOE-e4) allele, indicating a risk of Alzheimer's

102 <sup>f</sup>The Rey Auditory Verbal Learning Test (RAVLT) is a neuropsychological assessment that measures a person's verbal memory

103 \*significantly different at p<0.05 (no significant differences observed here)

106

107 Adults with acute TBI:TRACK-TBI: Data from individuals with an acute mild TBI were  
 108 obtained from TRACK-TBI<sup>15</sup>. Full details of TRACK-TBI and participant inclusion criteria are  
 109 found in supplementary materials 1. 461 participants aged 17-83 years with mild TBI (GCS 14-  
 110 15; N= 374) and orthopedic controls (N= 87) were included. In-person outcome assessments  
 111 were completed at two-weeks (including an MRI, RAVLT, and insomnia sleep index (ISI)), six-

112 months (RAVLT and ISI), and 12-months post injury (RAVLT and ISI). Participant  
113 characteristics for TRACK-TBI are presented in Table 2.

114

115 Table 2: TRACK-TBI Participant Characteristics

|                            | <b>TBI (mean ± SD)</b> | <b>No TBI (mean ± SD)</b> | <b>Difference</b>    |
|----------------------------|------------------------|---------------------------|----------------------|
| Age                        | 39.60 ± 15.83          | 39.58 ± 14.58             | t=-0.01              |
| Sex                        | 133 M, 241 F           | 28 M, 57 F                | X <sup>2</sup> =0.11 |
| Years of Education         | 13.08 ± 2.5            | 13.19 ± 2.3               | t=0.39               |
| Household Income           | \$35,000 to \$49,999   | \$35,000 to \$49,999      | t=0.77               |
| American Indian (%)        | 1%                     | 1%                        | X <sup>2</sup> =0    |
| Asian (%)                  | 2%                     | 5%                        | X <sup>2</sup> =1.00 |
| Black/African American (%) | 20%                    | 11%                       | X <sup>2</sup> =3.42 |
| White (%)                  | 74%                    | 82%                       | X <sup>2</sup> =1.99 |
| More than one/Unknown (%)  | 3%                     | 1%                        | X <sup>2</sup> =0.22 |
| ISI <sup>a</sup> 2 weeks   | 9.51 ± 7.3             | 9.58 ± 5.9                | t=0.095              |
| ISI 6 Months               | 7.69 ± 6.9             | 5.99 ± 5.3                | t=-2.49*             |
| ISI 12 Months              | 6.87 ± 6.6             | 6.79 ± 6.3                | t=-0.10              |

116 \*Indicates significant effect at p < 0.05.

117 <sup>a</sup>Insomnia Sleep Index (ISI)

118

### 119 *Standard Protocol Approvals, Registrations, and Patient Consents*

120 The TRACK-TBI and ADNI study were approved by the institutional review board of each  
121 enrolling institution, and all participants or their legally authorized representatives completed  
122 written informed consent.

123

### 124 *Sleep assessments*

125 The Pittsburgh Sleep Quality Index <sup>16</sup> was used to assess sleep disturbances in the  
126 ADNI/DoD sample. PSQI is a validated self-report questionnaire yielding information about  
127 overall sleep quality, latency, duration, efficiency, disturbances, medication use, and the effects  
128 on daytime function across a previous 30-day interval. The total score ranges from 0-21, with  
129 higher scores indicating worse sleep quality. PSQI has been used to assess insomnia in TBI and  
130 has been reported on previously in ADNI/DoD <sup>17</sup>.

131 The Insomnia Severity Index (ISI) was used to assess sleep disturbances in the TRACK-  
132 TBI sample. ISI is a seven-item self-report scale that assesses problems related to sleep onset,  
133 maintenance, and awakening; dissatisfaction with sleep patterns; interference of sleep problems  
134 with daily functioning; and noticeable impairments and levels of distress due to sleep  
135 dysfunction in the last two weeks <sup>18</sup>. The ISI has been assessed using TRACK-TBI previously  
136 <sup>19</sup>. The total score ranges from 0-28, with higher scores indicating worse insomnia.

137

### 138 *Memory assessments*

139 The Rey Auditory Verbal Learning Test (RAVLT) was assessed in both ADNI/DoD and  
140 TRACK-TBI samples. RAVLT is a list-learning task measuring auditory verbal memory <sup>20</sup> and  
141 consists of five learning trials where 15 words are read to the participant and the participant is  
142 asked to orally recall as many as possible. After a 30-minute delay, the participants are asked to  
143 recall the original list of 15 words. Then, a recognition trial is administered, with 15 studied

144 words and 15 non-studied words, where the participant determines which words were read from  
145 the original list. Outcome measures for RAVLT are total words recalled across five learning  
146 trials, recall following interference, recall following the delay, and the number of words correctly  
147 recognized with higher numbers indicating better memory performance.

#### 148 149 *MRI acquisition*

150 MRI acquisition details for ADNI/DoD are previously described<sup>21</sup>. Briefly, MRI scans  
151 were acquired using 18 3T scanners and included a three-dimensional, T1-weighted scan (voxel  
152 size=1.2×1.0×1.0 mm<sup>3</sup>) and a DWI sequence featuring 5 b=0s/mm<sup>2</sup> volumes and 41 diffusion-  
153 weighted volumes (voxel size=1.36x1.36x2.7mm<sup>3</sup>, b=1000 s/mm<sup>2</sup>).

154 MRI scans from TRACK-TBI were acquired across 11 centers using 13 3T scanners;  
155 standardization of the DWI measures across all 13 of the scanners was achieved using both a  
156 traveling volunteer and a diffusion phantom, ensuring that variability across scanners was  
157 negligible<sup>22</sup>. Participants were scanned using a DWI sequence featuring 8 b=0s/mm<sup>2</sup> volumes  
158 and 64 diffusion-weighted volumes at b=1300s/mm<sup>2</sup> (voxel size=2.7x2.7x2.7mm<sup>3</sup>). Sagittal  
159 three-dimensional T1-weighted images were also acquired. All scans were performed within 2  
160 weeks of injury.

#### 161 162 *DWI preprocessing*

163 Raw images were downloaded and used for this analysis. Preprocessing was performed  
164 using FMRIB Software Library (FSL) version 6.0. Data were motion- and eddy-current  
165 corrected. Skull-stripping was performed using the Brain Extraction Tool<sup>23</sup>. TOPUP<sup>24</sup> was used  
166 for correcting susceptibility-induced image distortions. The anatomical T1 scan was co-  
167 registered to the DWI scan using Advanced Normalization Tools (ANTs)<sup>25</sup>. DTIFIT<sup>26</sup> was used  
168 to fit a single tensor model at each voxel. Once these images were acquired, tract-based diffusion  
169 maps were calculated using TBSSv1.2 (Tract-Based Spatial Statistics)<sup>27</sup>. Each participant's  
170 fractional anisotropy (FA) map was nonlinearly warped to Montreal Neurological Institute  
171 (MNI152) space (1mm<sup>3</sup> voxel resolution) using the FMRIB58\_FA template using FSL's FNIRT  
172<sup>24</sup>. The data of each participant were projected onto the skeleton to obtain axial diffusivity,  
173 defined as the diffusion coefficient along the direction of maximum diffusivity (i.e., the primary  
174 diffusion eigenvalue,  $\lambda_1$ ), reflecting changes in barriers along that direction<sup>28</sup>.

175 Mean axial diffusivity was calculated across voxels within each of nine white-matter  
176 (WM) tracts-of-interest: left/right superior longitudinal fasciculus, fornix, left/right superior  
177 corona radiata, left/right anterior internal capsule, and left/right posterior internal capsule, as our  
178 pre-defined metric of axonal injury. The tracts were defined by mapping the Johns Hopkins  
179 University ICBM-DTI-81 White-Matter Labeled Atlas<sup>29</sup> regions to the WM skeleton in MNI152  
180 space. A full list of these tracts and their projections can be found in Supplementary Material 2.  
181 We chose to focus on these specific tracts based on prior literature describing their roles in sleep-  
182 wake states and transitions and importance for memory formation and consolidation<sup>9,30</sup>.

#### 183 184 *Statistical Analyses*

185 All statistical analyses were performed in RStudio Version 1.7. T-tests or Pearson's chi  
186 squared test of proportions were conducted to test for differences in demographic variables  
187 between those with a TBI and those without.

188 In the ADNI/DoD sample, differences in average axial diffusivity upon study visit 1  
189 (baseline) between groups (history of TBI vs no TBI) in each of the 9 *a priori* WM tracts-of-

190 interest (Table 3) were assessed using general linear models with a main effect of group,  
191 controlling for MRI scanner site, age, education, race, depression, lifetime PTSD, current PTSD,  
192 APOE4 status, and total number of TBIs. Next, to test for the effect of axial diffusivity at  
193 baseline on sleep disturbances (PSQI), we ran separate (for each WM tract-of-interest) general  
194 linear models with a main effect of axial diffusivity and group (TBI, no TBI), controlling for the  
195 aforementioned covariates. We included an axial diffusivity by group interaction to test if the  
196 associations statistically differed by group. False discovery rate-corrected (FDR) marginal effects  
197 were then calculated for each model as a measure of the independent association of axial  
198 diffusivity at baseline on sleep separately in each group (TBI and no TBI). All  $P$  values were  
199 corrected for multiple comparisons using Benjamini and Hochberg's false discovery rate (FDR)  
200 with a  $q$  level of 0.05, after pooling all  $p$  values from each model. To test for an effect of axial  
201 diffusivity at baseline on the change in memory scores (RAVLT Delayed Recall, Immediate  
202 Recall, and Recognition) over one-year (i.e., two timepoints: baseline and 12-months), we  
203 computed linear mixed effect models with fixed effects of axial diffusivity at baseline, time, an  
204 axial diffusivity at baseline by time interaction, and a participant-specific random intercept and  
205 slope; these analyses were performed in the TBI participants only, and were restricted to WM  
206 tracts that showed significant interaction effects in the generalized linear models.

207 To assess the generalizability of the ADNI/DoD finding, we tested the same hypotheses  
208 in an independent sample of participants with an acute (< two weeks) mild TBI from the  
209 TRACK-TBI dataset. To test for differences between groups (mTBI vs orthopedic control) in  
210 axial diffusivity, similar general linear models were performed with axial diffusivity in the ALIC  
211 (Figure 1) at two-weeks as the dependent variable, with a main effect of group while controlling  
212 for site, age, sex, education, and race (as previously reported<sup>10</sup>). To test for the effect of axial  
213 diffusivity two-weeks post-injury on sleep disturbances (ISI) over one-year (at two-weeks, six  
214 months, and 12 months), separate generalized linear models with a gamma family and inverse  
215 link function were run with a main effect of axial diffusivity at two-weeks and group (TBI vs  
216 orthopedic controls). An axial diffusivity by group interaction was again used to test if the  
217 associations statistically differed by group and FDR-corrected marginal effects were again used  
218 as a measure of the independent association of axial diffusivity at two-weeks on sleep separately  
219 in each group. Gamma generalized linear models were used owing to the heteroskedastic nature  
220 of the positively skewed outcome data. To test for the effect of axial diffusivity at two-weeks on  
221 change in memory (RAVLT Delayed Recall) over one-year (four time points), in the TBI  
222 participants only, a linear mixed effect model with fixed effects of axial diffusivity at two-weeks,  
223 time (two-weeks, six-months and twelve-months) and an axial diffusivity at two-weeks by time  
224 interaction, and a participant-specific random intercept and slope were computed, controlling for  
225 all covariates. Because TRACK-TBI also contained men and women with acute mTBI, we ran  
226 sex-specific interaction models to test for differences in these associations between men and  
227 women (Supplementary material 5). Significance was defined at  $p < 0.05$  for all models.

## 228 229 Results

### 230 *Axonal Injury and sleep in older adults with a TBI history*

231 Table 1 presents mean  $\pm$  standard deviation values for all participant characteristics in the  
232 ADNI/DoD sample. No significant differences in demographic characteristics were found  
233 between those with a history of TBI and those without. No significant differences in axial

234 diffusivity in any WM tract were found between those with a history of TBI and those without  
235 (Supplementary Material 3).

236  
237 There was a significant positive relationship between baseline axial diffusivity in the left  
238 anterior internal capsule (Figure 1) and PSQI in the TBI group only [ $\beta = 9.52e+7$ ,  $R^2=0.06$ , 95%  
239 CI (1.5e+07, 1.4e+08),  $p_{\text{FDR-corrected}} \leq .01$ ] indicating that increased axial diffusivity was  
240 associated with increased sleep disturbances in those with a history of TBI. The association was  
241 statistically different between groups, where no significant association was found in those  
242 without a history of TBI [ $\beta = 0.09$ ,  $R^2=0.33$ , 95% CI (-1.2e+08, 9.6e+06),  $p_{\text{FDR-corrected}} = .21$ ]  
243 (Figure 2). Full model results are presented in Supplementary Material 4.  
244



245  
246 *Figure 1:* Typical projections of the left anterior internal capsule estimated from normative DWI  
247 data: a) left anterior internal capsule outlined by JHU ICBM-DTI-81. b) white-matter fibers  
248 seeded from the anterior limb of internal capsule using probabilistic tractography (20,000  
249 streamlines), showing projections to the orbitofrontal cortex, ventromedial prefrontal cortex,  
250 dorsal anterior cingulate cortex, ventrolateral prefrontal cortex, thalamus, caudate nucleus, and  
251 the putamen. c) track density image of the streamlines seeded from the left anterior internal  
252 capsule, with brighter regions representing areas of higher fiber density and the color scale  
253 indicating fiber direction (green=anterior/posterior, blue=superior/inferior, and  
254 red=medial/lateral). These analyses were performed in MRtrix3 software with previously  
255 described methods<sup>31</sup>, using an average fiber orientation distribution (FOD) template derived  
256 from healthy participant 3T DWI scans collected as part of the Human Connectome Project<sup>32</sup>.

257



258  
 259 *Figure 2: Scatter plot showing a significant positive association between axial diffusivity in the left*  
 260 *anterior internal capsule (x axis) and sleep disturbances (as measured by the PSQI, on the y-axis) in the*  
 261 *TBI group (orange slope). This association was significantly different to those without TBI, where the*  
 262 *slope of the association was not significant (full model results are found in supplementary material 4).*

263 *Axonal injury and cognition in older adults with a TBI history*

264 A significant axial diffusivity by timepoint interaction was found for RAVLT delayed  
 265 recall [ $\beta = -8.72e+7$ , 95% CI (-1.8e+08, -2.7e+07),  $\eta^2 = 0.04$ ,  $p_{\text{FDR-corrected}} = .027$ ], indicating that  
 266 axial diffusivity in the left anterior internal capsule at session one was associated with changes in  
 267 delayed recall over one year (Figure 3). Marginal effects revealed a significant effect of time  
 268 when axial diffusivity was one standard deviation below the mean (Figure 3). No significant  
 269 interaction was found for RAVLT recognition [ $p_{\text{FDR-corrected}} = .56$ ] or RAVLT immediate recall  
 270 [ $p_{\text{FDR-corrected}} = .97$ ].

271



282 *Figure 3: Marginal effects plot of axial diffusivity by time interaction showing that when axial diffusivity*  
 283 *within the left anterior internal capsule is -1SD below the mean (less axonal injury) delayed recall*  
 284 *memory (RAVLT) is better at one year. This association is opposite with axial diffusivity +1SD above the*  
 285 *mean (more axonal injury) albeit not significant.*

286 *Axonal injury following acute mTBI and sleep over one year*

287 The TRACK-TBI sample showed significantly higher axial diffusivity in the left anterior  
 288 internal capsule in the mTBI group compared to the orthopedic control group, after controlling  
 289 for all covariates [ $\beta = 1.58e-08$ , 95% CI (5.3e-11, 3.2e-08),  $p = .037$ ], as previously reported<sup>10,33</sup>.

291 There was a significant positive relationship between two-week axial diffusivity in the  
 292 left anterior internal capsule and ISI at two-weeks, six months, and 12 months post injury (Table  
 293 3) in the TBI group only, such that higher axial diffusivity acutely following mTBI was  
 294 associated with higher ISI score (i.e., worse insomnia) at each time point. The association was  
 295 statistically different compared to orthopedic controls at two-weeks and six-months, where no  
 296 significant association was found in orthopedic controls at six-months or 12 months (Table 3 and  
 297 Figure 4).

298  
 299 Table 3: Axonal injury following acute mTBI and sleep over 1 year TRACK-TBI

| Timepoint  | TBI Marginal Effect $\beta$ , (95% CI), $p_{FDR-corrected}$ | No TBI Marginal Effect $\beta$ , (95% CI), $p_{FDR-corrected}$ | Interaction $\beta$ , (95% CI), $p_{FDR-corrected}$ |
|------------|-------------------------------------------------------------|----------------------------------------------------------------|-----------------------------------------------------|
| Two weeks  | 7.2e+04, (-1.4e+05, -5.0e+03), 0.04                         | -2.1e+05, (5.8e+04, 3.6e+05), 0.01                             | 2.827e+05, (-4.7e+05, -7.9e+04), $\leq .01$         |
| Six months | 1.6e+05, (-2.4e+05, -7.6e+04), $\leq .01$                   | -2.1e+05, (-4.3e+04, 4.5e+05), 0.10                            | 3.618e+05, (-6.7e+05, -1.4e+05), .04                |
| 12 months  | 1.1e+05, (-1.9e+05, -8.5e+03), 0.03                         | -1.1e+05, (-1.5e+05, 3.6e+06), 0.40                            | 2.087e+05, (-5.4e+05, 1.3e+05), .23                 |

300



301  
 302 *Figure 4: Scatter plots showing a significant positive association between axial diffusivity in the left*  
 303 *anterior internal capsule (x axis) at two-weeks post injury and sleep disturbances (as measured by the ISI,*  
 304 *on the y-axis) at two weeks, six months and 12 months after injury in the TBI group (orange slope). This*  
 305 *association was significantly different to those without TBI at two weeks and six months, where the slope*  
 306 *of the association was not significant in the control group (at six months or 12 months).*

307 *Acute axonal injury and cognition in mTBI*

308 No significant *axial diffusivity x time* (two-weeks, six-months, twelve-months)  
 309 interaction for RAVLT delayed recall was found [ $p_{FDR-corrected} = 0.22$ ], such that axonal injury to  
 310 the left anterior internal capsule was not related to change in delayed recall over one year post  
 311 injury.

312  
 313 Discussion

314 In the ADNI/DoD sample of participants with a history of moderate to severe TBI, higher  
315 axial diffusivity in the left anterior internal capsule, thought to be a marker of axonal injury, was  
316 associated with more sleep disturbances. Axonal injury in this tract was further associated with  
317 longitudinal changes in delayed memory function. Using a second, independent sample of  
318 individuals with an acute mild TBI (TRACK-TBI data), we report robust evidence that axial  
319 diffusivity at two-weeks post-mTBI in the left anterior internal capsule was significantly  
320 associated with sleep disturbances at two-weeks, six-months, and twelve-months post-injury,  
321 demonstrating the generalizability of this finding across injury severities, populations and time  
322 since injury.

323 The anterior internal capsule carries both efferent and afferent thalamocortical projection  
324 fibers to many structures involved in sleep-wake states, including the thalamus, caudate nucleus,  
325 and putamen (Figure 4). Importantly, the thalamus has a strong influence on circadian rhythms  
326 and melatonin production<sup>34</sup>, and is a key controller of arousal states during sleep-wake  
327 transitions<sup>35</sup>. There is also evidence that thalamo-cortical network mechanisms are involved in  
328 memory formation<sup>35</sup>. The caudate nucleus has been suggested to be a key structure involved in  
329 sleep-wake states due to its role in regulation of cortical excitability<sup>36</sup>, with activity increasing  
330 during rapid eye movement (REM) sleep and decreasing during slow-wave sleep<sup>37</sup>. If neurons  
331 are not firing properly in the caudate nucleus due to damage to the thalamocortical projection  
332 fibers, cortical excitability levels may be altered, potentially leading to disturbed REM and slow-  
333 wave sleep. The putamen is involved in autonomic regulation, with neuroimaging research  
334 showing decreased blood-oxygen-level-dependent (BOLD) signal activation after sleep  
335 deprivation<sup>38</sup> and smaller volume in sleep disorders<sup>39</sup>. Hence, if the anterior internal capsule is  
336 damaged, projections to these important sleep-related structures may be dysregulated, leading to  
337 sleep-wake disturbances. Importantly, only the left, but not right, anterior internal capsule was  
338 associated with sleep disturbances. This however is in line with prior studies suggesting a left  
339 hemisphere dominance in the waking state, such that left hemisphere activity may be associated  
340 with fragmented sleep, greater sleep debt, and increased daytime sleepiness<sup>40</sup>.

341  
342 While definitive conclusions about directionality cannot be made, our findings from the  
343 TRACK-TBI data in individuals two-weeks out from their injury may suggest that 1) TBI leads  
344 to axonal injury in the left anterior internal capsule (as previously reported in Palacios et al.,  
345 2020) and 2) this damage to the left anterior internal capsule may have an acute impact on sleep  
346 that persists over time and up to twelve-months following the injury. Although a large body of  
347 literature suggests sleep quality may affect WM integrity over time<sup>9</sup>, other evidence shows that  
348 damage to WM can precede sleep deficits. For example, multiple sclerosis, an auto-immune  
349 disease that causes demyelination, has been linked with the onset of sleep disorders<sup>11</sup>, and the  
350 specific location of the WM lesions is associated with the type of sleep disorder<sup>11</sup>. Similarly, in  
351 subcortical ischemic vascular dementia, which affects frontal-subcortical WM tracts, WM  
352 hyperintensity severity has been linked to sleep disturbances<sup>42</sup>. Our results may be further  
353 supported by mouse models showing that myelin damage can lead to sleep impairments<sup>43</sup>,  
354 suggesting that in certain cases, WM damage may be the cause of sleep impairments. Moreover,  
355 given the short delay between the injury and the DWI scan in the TRACK-TBI sample, it seems  
356 unlikely that poor sleep in those initial two weeks is solely responsible for the axonal injury<sup>44</sup>.  
357 Nevertheless, these postulations about directionality cannot be extended to the older adult data. It  
358 is important to consider other factors that may have influenced the association between axonal  
359 injury and sleep disturbances in the ADNI/DoD sample, such as time since injury, comorbid

360 PTSD, anxiety, depression, and numerous other factors that are associated with veterans.  
361 Nevertheless, our results showing that the associations are specific to those with a TBI  
362 demonstrate a robust link between axonal injury within the ALIC and sleep disturbances in TBI,  
363 irrespective of directionality.

364 The relative amount of damage to the left anterior internal capsule in those with a history  
365 of TBI influences longitudinal memory function. Specifically, less axonal injury was related to  
366 better performance on a delayed memory task across one year in the older adults with a history  
367 of TBI. Prior work has also shown associations between delayed recall and WM integrity in left  
368 anterior internal capsule in patients with schizophrenia<sup>45</sup>. The coupling of thalamocortical sleep  
369 oscillations with slow oscillations that emerge from the frontal cortices have been shown to be  
370 important for memory consolidation<sup>46</sup>. If lasting axonal injury to the anterior internal capsule  
371 from a TBI impacts the timely associations between these oscillatory mechanisms of memory  
372 consolidation, then this could provide one explanation as to why this measure of WM integrity  
373 was associated with changes in delayed memory over time. However, these results were limited  
374 to older adults in the ADNI/DoD sample with a history of TBI. The findings were not seen in the  
375 TRACK-TBI sample, for several possible reasons. The relationship between axonal injury and  
376 memory disturbances may not appear immediately after injury, and instead these disturbances  
377 may be a result of aging with this injury. Additionally, TRACK-TBI included a wider range of  
378 adults, with an average age of 39 years old, much younger than the ADNI/DoD sample and with  
379 mild TBI's as opposed to moderate-severe TBIs seen in the ADNI/DoD sample. Despite  
380 controlling for age in analyses, effects of aging on cognition may still be present. Additionally,  
381 the multiple timepoints for repeat testing over one year (more in the TRACK-TBI study) may  
382 have influenced performance due to practice effects. In the ADNI/DoD sample, we also found  
383 improved performance across testing instances that was also likely due to practice effects.  
384 Regardless, susceptibility to practice effects themselves have been posited to be an important  
385 early indicator of longitudinal cognitive decline<sup>47</sup>.

386 This study had limitations. First, while the sample across both datasets is large, many  
387 participants from the wider sample were not included due to not undergoing MRI or were  
388 excluded for incomplete data required for our analysis. Second, a history of TBI in the  
389 ADNI/DoD was self-reported, potentially leading to incorrect classification or missed TBIs from  
390 the control group. Third, the ADNI/DoD sample only consisted of male veterans and TRACK-  
391 TBI contained both men and women. Our supplementary analysis showed no effect of sex on the  
392 associations between axonal injury and sleep at baseline or twelve months but a differential  
393 effect at six months post injury. Given the importance of biological sex to the recovery of TBI,  
394 future research should study sex-specific research questions directly<sup>48</sup>. Fourth, TRACK-TBI used  
395 orthopedic controls, defined as individuals who had sustained an injury, but not to the head or  
396 neck; these other injury types may have transiently impacted sleep quality. This may explain why  
397 sleep disturbances at two-weeks post-injury were similar between the mTBI and orthopedic  
398 control groups, which resolved by month six in the control group only. Fifth, the sleep  
399 questionnaires were also self-reported, potentially introducing bias, although both PSQI and ISI  
400 are validated questionnaires to assess sleep. Additionally, there is no data on sleep complaints  
401 prior to injury, so causality cannot be directly inferred. The sleep quality questionnaires were  
402 different between datasets; however, this could be a strength of our study, suggesting our  
403 findings are reproducible across sleep measures. Seventh, ADNI/DoD included moderate-to-  
404 severe TBI, whilst TRACK-TBI included mTBI. Moderate-to-severe TBIs are expected to have

405 longer consequences and associated focal injuries which may affect how generalizable these  
406 results are across groups. Eighth, the ADNI sample consisted of veterans with PTSD due to the  
407 nature of the ADNI study. PTSD may be a potential bias due to mixed effects of TBI and PTSD.  
408 However, PTSD was used as a covariate and there were no PTSD differences between groups.  
409 The TRACK-TBI sample did not have measures of PTSD, hence this bias could not be addressed  
410 here. We must take interpretations of these results with caution as this change in microstructure  
411 due to sleep disturbances may be accelerated by other comorbidities, such as PTSD, anxiety,  
412 depression, among others.

413

#### 414 Conclusion

415 Using two independent datasets, this study provides unique insights into the acute and  
416 long-term associations of axonal injury and sleep disturbances in TBI. Our findings span  
417 multiple populations, ages, and times since injury, providing robust evidence of an association  
418 between axonal injury to the left anterior internal capsule and sleep disturbances and memory  
419 impairments in those with TBI. The results may suggest that quantification of axonal injury to  
420 the left anterior internal capsule could help clinicians identify patients at risk for continued sleep  
421 disturbances and related health consequences following TBI. Our results suggest that, if left  
422 untreated, this damage may portend poorer cognitive aging later in life. Clinically identifying  
423 axonal injury early after a TBI may provide a potential early therapeutic target to maintain WM  
424 integrity or improve sleep in TBI population. With the early implementation of such  
425 interventions, memory decline with age may be diminished in those with a prior TBI.

426

#### 427 Acknowledgments

428 Data collection and sharing for this project was funded by the Alzheimer's Disease  
429 Neuroimaging Initiative (ADNI) (National Institutes of Health Grant U01 AG024904) and DOD  
430 ADNI (Department of Defense award number W81XWH-12-2-0012). ADNI is funded by the  
431 National Institute on Aging, the National Institute of Biomedical Imaging and Bioengineering,  
432 and through generous contributions from the following: AbbVie, Alzheimer's Association;  
433 Alzheimer's Drug Discovery Foundation; Araclon Biotech; BioClinica, Inc.; Biogen; Bristol-  
434 Myers Squibb Company; CereSpir, Inc.; Cogstate; Eisai Inc.; Elan Pharmaceuticals, Inc.; Eli  
435 Lilly and Company; EuroImmun; F. Hoffmann-La Roche Ltd and its affiliated company  
436 Genentech, Inc.; Fujirebio; GE Healthcare; IXICO Ltd.; Janssen Alzheimer Immunotherapy  
437 Research & Development, LLC.; Johnson & Johnson Pharmaceutical Research & Development  
438 LLC.; Lumosity; Lundbeck; Merck & Co., Inc.; Meso Scale Diagnostics, LLC.; NeuroRx  
439 Research; Neurotrack Technologies; Novartis Pharmaceuticals Corporation; Pfizer Inc.; Piramal  
440 Imaging; Servier; Takeda Pharmaceutical Company; and Transition Therapeutics. The Canadian  
441 Institutes of Health Research is providing funds to support ADNI clinical sites in Canada. Private  
442 sector contributions are facilitated by the Foundation for the National Institutes of Health  
443 ([www.fnih.org](http://www.fnih.org)). The grantee organization is the Northern California Institute for Research and  
444 Education, and the study is coordinated by the Alzheimer's Therapeutic Research Institute at the  
445 University of Southern California. ADNI data are disseminated by the Laboratory for Neuro  
446 Imaging at the University of Southern California. Data used in preparation of this article were  
447 obtained from the Alzheimer's Disease Neuroimaging Initiative (ADNI) database  
448 ([adni.loni.usc.edu](http://adni.loni.usc.edu)). As such, the investigators within the ADNI contributed to the design and  
449 implementation of ADNI and/or provided data but did not participate in analysis or writing of  
450 this report. A complete listing of ADNI investigators can be found at:

451 [content/uploads/how\\_to\\_apply/ADNI\\_Acknowledgement\\_List.pdf](#). Other data and/or research  
452 tools used in the preparation of this manuscript were obtained and analyzed from the controlled  
453 access datasets distributed from the DOD- and NIH-supported Federal Interagency Traumatic  
454 Brain Injury Research (FITBIR) Informatics Systems. FITBIR is a collaborative biomedical  
455 informatics system created by the Department of Defense and the National Institutes of Health to  
456 provide a national resource to support and accelerate research in TBI. Dataset identifier:  
457 NCT01565551. TRACT-TBI was funded by the US National Institutes of Health, National  
458 Institute of Neurologic Disorders and Stroke (grant U01 NS1365885) and supported by the US  
459 Department of Defense (grant W81XWH-14-2-0176). This manuscript reflects the views of the  
460 authors and may not reflect the opinions or views of the DOD, NIH, or of the Submitters  
461 submitting original data to FITBIR Informatics System.

462  
463 Author Contributions:  
464 ET: conception and design of the study, acquisition and analysis of data & drafting a significant  
465 portion of the manuscript or figures  
466 GE: acquisition and analysis of data  
467 AW: drafting a significant portion of the manuscript or figures  
468 LW: conception and design of the study  
469 AS: conception and design of the study  
470 CH: conception and design of the study  
471 TM: conception and design of the study, acquisition and analysis of data & drafting a significant  
472 portion of the manuscript or figures

- 473 1. Maas AI, Harrison-Felix CL, Menon D, et al. Common data elements for traumatic brain  
474 injury: recommendations from the interagency working group on demographics and clinical  
475 assessment. *Arch Phys Med Rehabil*. 2010;91(11):1641-1649.  
476 doi:10.1016/j.apmr.2010.07.232
- 477 2. Ouellet MC, Beaulieu-Bonneau S, Morin CM. Insomnia in patients with traumatic brain  
478 injury: frequency, characteristics, and risk factors. *J Head Trauma Rehabil*. 2006;21(3):199-  
479 212. doi:10.1097/00001199-200605000-00001
- 480 3. Thaxton L, Myers MA. Sleep Disturbances and Their Management in Patients with Brain  
481 Injury. *J Head Trauma Rehabil*. 2002;17(4):335.
- 482 4. Miyata S, Noda A, Iamoto K, Kawano N, Okuda M, Ozaki N. Poor sleep quality impairs  
483 cognitive performance in older adults. *J Sleep Res*. 2013;22(5):535-541.  
484 doi:10.1111/jsr.12054
- 485 5. Brett BL, Temkin N, Barber JK, et al. Long-term Multi-domain Patterns of Change  
486 Following Traumatic Brain Injury: A TRACK-TBI LONG Study. *Neurology*. Published  
487 online June 21, 2023:10.1212/WNL.0000000000207501.  
488 doi:10.1212/WNL.0000000000207501
- 489 6. Wood RL. Accelerated cognitive aging following severe traumatic brain injury: A review.  
490 *Brain Inj*. 2017;31(10):1270-1278. doi:10.1080/02699052.2017.1332387
- 491 7. Shida AF, Massett RJ, Imms P, Vegesna RV, Amgalan A, Irimia A. Significant Acceleration  
492 of Regional Brain Aging and Atrophy After Mild Traumatic Brain Injury. *J Gerontol Ser A*.  
493 Published online March 5, 2023:glad079. doi:10.1093/gerona/glad079
- 494 8. Yaffe K, Nasrallah I, Hoang TD, et al. Sleep Duration and White Matter Quality in Middle-  
495 Aged Adults. *Sleep*. 2016;39(9):1743-1747. doi:10.5665/sleep.6104
- 496 9. Sanjari Moghaddam H, Mohammadi E, Dolatshahi M, et al. White matter microstructural  
497 abnormalities in primary insomnia: A systematic review of diffusion tensor imaging studies.  
498 *Prog Neuropsychopharmacol Biol Psychiatry*. 2021;105:110132.  
499 doi:10.1016/j.pnpbp.2020.110132
- 500 10. Palacios EM, Owen JP, Yuh EL, et al. The evolution of white matter microstructural changes  
501 after mild traumatic brain injury: A longitudinal DTI and NODDI study. *Sci Adv*.  
502 2020;6(32):eaaz6892. doi:10.1126/sciadv.aaz6892
- 503 11. Foschi M, Rizzo G, Liguori R, et al. Sleep-related disorders and their relationship with MRI  
504 findings in multiple sclerosis. *Sleep Med*. 2019;56:90-97. doi:10.1016/j.sleep.2019.01.010
- 505 12. Kokošová V, Filip P, Kec D, Baláž M. Bidirectional Association Between Sleep and Brain  
506 Atrophy in Aging. *Front Aging Neurosci*. 2021;13. Accessed February 15, 2024.  
507 <https://www.frontiersin.org/articles/10.3389/fnagi.2021.726662>

- 508 13. Wang Q, Hu S, Qi L, et al. Causal associations between sleep traits and brain structure: a  
509 bidirectional Mendelian randomization study. *Behav Brain Funct.* 2023;19(1):17.  
510 doi:10.1186/s12993-023-00220-z
- 511 14. Kraus MF, Susmaras T, Caughlin BP, Walker CJ, Sweeney JA, Little DM. White matter  
512 integrity and cognition in chronic traumatic brain injury: a diffusion tensor imaging study.  
513 *Brain.* 2007;130(10):2508-2519. doi:10.1093/brain/awm216
- 514 15. Yue JK, Vassar MJ, Lingsma HF, et al. Transforming Research and Clinical Knowledge in  
515 Traumatic Brain Injury Pilot: Multicenter Implementation of the Common Data Elements for  
516 Traumatic Brain Injury. *J Neurotrauma.* 2013;30(22):1831-1844. doi:10.1089/neu.2013.2970
- 517 16. Buysse DJ, Reynolds CF, Monk TH, Berman SR, Kupfer DJ. The Pittsburgh Sleep Quality  
518 Index: a new instrument for psychiatric practice and research. *Psychiatry Res.*  
519 1989;28(2):193-213. doi:10.1016/0165-1781(89)90047-4
- 520 17. Andrews M, Ross R, Malhotra A, et al. Sleep and Tau Pathology in Vietnam War Veterans  
521 with Preclinical and Prodromal Alzheimer's Disease. *J Alzheimers Dis Rep.* 2021;5(1):41-48.  
522 doi:10.3233/ADR-200245
- 523 18. Bastien CH, Vallières A, Morin CM. Validation of the Insomnia Severity Index as an  
524 outcome measure for insomnia research. *Sleep Med.* 2001;2(4):297-307. doi:10.1016/s1389-  
525 9457(00)00065-4
- 526 19. Wickwire EM, Albrecht JS, Capaldi VF II, et al. Trajectories of Insomnia in Adults After  
527 Traumatic Brain Injury. *JAMA Netw Open.* 2022;5(1):e2145310.  
528 doi:10.1001/jamanetworkopen.2021.45310
- 529 20. Bean J. Rey Auditory Verbal Learning Test, Rey AVLT. In: Kreutzer JS, DeLuca J, Caplan B,  
530 eds. *Encyclopedia of Clinical Neuropsychology.* Springer; 2011:2174-2175.  
531 doi:10.1007/978-0-387-79948-3\_1153
- 532 21. Jack Jr. CR, Bernstein MA, Fox NC, et al. The Alzheimer's disease neuroimaging initiative  
533 (ADNI): MRI methods. *J Magn Reson Imaging.* 2008;27(4):685-691.  
534 doi:10.1002/jmri.21049
- 535 22. Palacios EM, Martin AJ, Boss MA, et al. Toward Precision and Reproducibility of Diffusion  
536 Tensor Imaging: A Multicenter Diffusion Phantom and Traveling Volunteer Study. *AJNR Am*  
537 *J Neuroradiol.* 2017;38(3):537-545. doi:10.3174/ajnr.A5025
- 538 23. Smith SM. Fast robust automated brain extraction. *Hum Brain Mapp.* 2002;17(3):143-155.  
539 doi:10.1002/HBM.10062
- 540 24. Andersson JLR, Jenkinson M, Smith S. Non-linear registration aka Spatial normalisation  
541 FMRIB Technical Report TR07JA2. Published online 2007.

- 542 25. Avants BB, Tustison NJ, Song G, Cook PA, Klein A, Gee JC. A reproducible evaluation of  
543 ANTs similarity metric performance in brain image registration. *NeuroImage*.  
544 2011;54(3):2033-2044. doi:10.1016/j.neuroimage.2010.09.025
- 545 26. Behrens T e. j., Woolrich M w., Jenkinson M, et al. Characterization and propagation of  
546 uncertainty in diffusion-weighted MR imaging. *Magn Reson Med*. 2003;50(5):1077-1088.  
547 doi:10.1002/mrm.10609
- 548 27. Smith SM, Jenkinson M, Johansen-Berg H, et al. Tract-based spatial statistics: Voxelwise  
549 analysis of multi-subject diffusion data. *NeuroImage*. 2006;31(4):1487-1505.  
550 doi:10.1016/J.NEUROIMAGE.2006.02.024
- 551 28. Song SK, Sun SW, Ramsbottom MJ, Chang C, Russell J, Cross AH. Dysmyelination  
552 Revealed through MRI as Increased Radial (but Unchanged Axial) Diffusion of Water.  
553 *NeuroImage*. 2002;17(3):1429-1436. doi:10.1006/NIMG.2002.1267
- 554 29. Mori S, Wakana S, Zijl PCM van, Nagee-Poetscher LM. *MRI Atlas of Human White Matter*.  
555 Elsevier; 2005.
- 556 30. Matorina N, Tseng J, Ladyka-Wojcik N, Olsen R, Mabbott DJ, Barense MD. Sleep  
557 Differentially and Profoundly Impairs Recall Memory in a Patient with Fornix Damage. *J*  
558 *Cogn Neurosci*. 2023;35(10):1635-1655. doi:10.1162/jocn\_a\_02038
- 559 31. Tournier JD, Smith R, Raffelt D, et al. MRtrix3: A fast, flexible and open software  
560 framework for medical image processing and visualisation. *NeuroImage*. 2019;202:116137.  
561 doi:10.1016/J.NEUROIMAGE.2019.116137
- 562 32. Glasser MF, Sotiropoulos SN, Wilson JA, et al. The minimal preprocessing pipelines for the  
563 Human Connectome Project. *NeuroImage*. 2013;80:105-124.  
564 doi:10.1016/j.neuroimage.2013.04.127
- 565 33. Palacios EM, Yuh EL, Mac Donald CL, et al. Diffusion Tensor Imaging Reveals Elevated  
566 Diffusivity of White Matter Microstructure that Is Independently Associated with Long-Term  
567 Outcome after Mild Traumatic Brain Injury: A TRACK-TBI Study. *J Neurotrauma*.  
568 2022;39(19-20):1318-1328. doi:10.1089/neu.2021.0408
- 569 34. Jan JE, Reiter RJ, Wasdell MB, Bax M. The role of the thalamus in sleep, pineal melatonin  
570 production, and circadian rhythm sleep disorders. *J Pineal Res*. 2009;46(1):1-7.  
571 doi:10.1111/j.1600-079X.2008.00628.x
- 572 35. Gent TC, Bassetti CL, Adamantidis AR. Sleep-wake control and the thalamus. *Curr Opin*  
573 *Neurobiol*. 2018;52:188-197. doi:10.1016/j.conb.2018.08.002
- 574 36. Stoffers D, Altena E, van der Werf YD, et al. The caudate: a key node in the neuronal  
575 network imbalance of insomnia? *Brain J Neurol*. 2014;137(Pt 2):610-620.  
576 doi:10.1093/brain/awt329

- 577 37. Braun AR, Balkin TJ, Wesenten NJ, et al. Regional cerebral blood flow throughout the sleep-  
578 wake cycle. An H<sub>2</sub>(15)O PET study. *Brain J Neurol.* 1997;120 ( Pt 7):1173-1197.  
579 doi:10.1093/brain/120.7.1173
- 580 38. Wang H, Yu K, Yang T, et al. Altered Functional Connectivity in the Resting State  
581 Neostriatum After Complete Sleep Deprivation: Impairment of Motor Control and  
582 Regulatory Network. *Front Neurosci.* 2021;15:665687. doi:10.3389/fnins.2021.665687
- 583 39. Kumar S, Rao SL, Chandramouli BA, Pillai S. Reduced contribution of executive functions  
584 in impaired working memory performance in mild traumatic brain injury patients. *Clin*  
585 *Neurol Neurosurg.* 2013;115(8):1326-1332. doi:10.1016/j.clineuro.2012.12.038
- 586 40. Reyes S, Rimkus C de M, Lozoff B, Algarin C, Peirano P. Nighttime Sleep Characteristics  
587 and White Matter Integrity in Young Adults. *Nat Sci Sleep.* 2022;14:1363-1373.  
588 doi:10.2147/NSS.S360311
- 589 41. Calamante F, Tournier JD, Jackson GD, Connelly A. Track-density imaging (TDI): super-  
590 resolution white matter imaging using whole-brain track-density mapping. *NeuroImage.*  
591 2010;53(4):1233-1243. doi:10.1016/j.neuroimage.2010.07.024
- 592 42. Cheng CY, Tsai CF, Wang SJ, Hsu CY, Fuh JL. Sleep Disturbance Correlates With White  
593 Matter Hyperintensity in Patients With Subcortical Ischemic Vascular Dementia. *J Geriatr*  
594 *Psychiatry Neurol.* 2013;26(3):158-164. doi:10.1177/0891988713493503
- 595 43. Hor H, Bartesaghi L, Kutalik Z, et al. A missense mutation in myelin oligodendrocyte  
596 glycoprotein as a cause of familial narcolepsy with cataplexy. *Am J Hum Genet.*  
597 2011;89(3):474-479. doi:10.1016/j.ajhg.2011.08.007
- 598 44. Bellesi M, de Vivo L, Chini M, Gilli F, Tononi G, Cirelli C. Sleep Loss Promotes Astrocytic  
599 Phagocytosis and Microglial Activation in Mouse Cerebral Cortex. *J Neurosci Off J Soc*  
600 *Neurosci.* 2017;37(21):5263-5273. doi:10.1523/JNEUROSCI.3981-16.2017
- 601 45. Rosenberger G, Nestor PG, Oh JS, et al. Anterior Limb of the Internal Capsule in  
602 Schizophrenia: A Diffusion Tensor Tractography Study. *Brain Imaging Behav.*  
603 2012;6(3):417-425. doi:10.1007/s11682-012-9152-9
- 604 46. Niknazar M, Krishnan GP, Bazhenov M, Mednick SC. Coupling of Thalamocortical Sleep  
605 Oscillations Are Important for Memory Consolidation in Humans. *PloS One.*  
606 2015;10(12):e0144720. doi:10.1371/journal.pone.0144720
- 607 47. Jutten RJ, Grandoit E, Foldi NS, et al. Lower practice effects as a marker of cognitive  
608 performance and dementia risk: A literature review. *Alzheimers Dement Diagn Assess Dis*  
609 *Monit.* 2020;12(1):e12055. doi:10.1002/dad2.12055
- 610 48. Gupte RP, Brooks WM, Vukas RR, Pierce JD, Harris JL. Sex Differences in Traumatic Brain  
611 Injury: What We Know and What We Should Know. *J Neurotrauma.* 2019;36(22):3063-  
612 3091. doi:10.1089/neu.2018.6171
